# Supplementary material
Source: PubMed Central journal article supplement (PMC6413836)
Supplement: halms1319999-supplement_1.pdf [file halms1319999-supplement_1.pdf]

Table 2bis. Hazard ratios of invasive breast cancer for EP-MHT use compared with MHT never-use.

|                 | Ever use of EP-MHT |                        | Recent use of EP-MHT |                        | Past use of EP-MHT |                        |
|-----------------|--------------------|------------------------|----------------------|------------------------|--------------------|------------------------|
|                 | No. of cases*      | Hazard ratio (95% CI)† | No. of cases         | Hazard ratio (95% CI)† | No. of cases       | Hazard ratio (95% CI)† |
| <b>Gap time</b> |                    |                        |                      |                        |                    |                        |
| ≤ 1 year        | 660                | 1.56 (1.38-1.76)       | 586                  | 1.63 (1.43-1.84)       | 64                 | 1.16 (0.89-1.51)       |
| 1-3 years       | 225                | 1.45 (1.24-1.71)       | 200                  | 1.54 (1.30-1.82)       | 21                 | 0.91 (0.59-1.41)       |
| 3-5 years       | 68                 | 1.20 (0.93-1.55)       | 61                   | 1.33 (1.02-1.74)       | 7                  | 0.69 (0.33-1.46)       |
| > 5 years       | 114                | 1.37 (1.12-1.69)       | 90                   | 1.37 (1.09-1.72)       | 21                 | 1.24 (0.80-1.93)       |

Abbreviations: EP-MHT, estrogen-progestagen menopausal hormone therapy; CI, confidence interval

\* 17 cases were diagnosed among women for whom recency of use was not known; 567 cases were further diagnosed among MHT never-users; and 92 among women with a missing MHT exposure status

† Adjusted for: age (time scale) and age at menopause (continuous). Further stratified on year of birth ([1925-1930]/[1930-1935]/[1935-1940]/[1940-1945]/[1945-1950])

Table 3bis. Hazard ratios of invasive breast cancer for EP-MHT recent use, according to gap time, type of progestagen and total duration of use, compared with MHT never-use. E3N study 1992-2005.

|                                                   | Total duration of EP-MHT use |                        |              |                        |              |                        |              |                        | <i>P for trend with duration of use</i> |
|---------------------------------------------------|------------------------------|------------------------|--------------|------------------------|--------------|------------------------|--------------|------------------------|-----------------------------------------|
|                                                   | ≤2 years                     |                        | ]2-5] years  |                        | ]5-10] years |                        | >10 years    |                        |                                         |
|                                                   | No. of cases                 | Hazard ratio* (95% CI) | No. of cases | Hazard ratio* (95% CI) | No. of cases | Hazard ratio* (95% CI) | No. of cases | Hazard ratio* (95% CI) |                                         |
| <b>Recent use of any type of EP-MHT</b>           |                              |                        |              |                        |              |                        |              |                        |                                         |
| Gap time ≤ 1 year                                 | 133                          | 1.61 (1.30-1.98)       | 163          | 1.45 (1.20-1.74)       | 196          | 1.64 (1.38-1.95)       | 94           | 1.91 (1.51-2.41)       | 0.10                                    |
| Gap time 1-3 years                                | 45                           | 1.38 (1.01-1.89)       | 66           | 1.60 (1.23-2.08)       | 64           | 1.48 (1.13-1.93)       | 25           | 1.83 (1.22-2.76)       | 0.46                                    |
| Gap time 3-5 years                                | 10                           | 0.94 (0.50-1.77)       | 19           | 1.36 (0.86-2.16)       | 25           | 1.56 (1.04-2.34)       | 7            | 1.41 (0.67-3.00)       | 0.36                                    |
| Gap time > 5 years                                | 17                           | 1.03 (0.64-1.68)       | 33           | 1.63 (1.14-2.33)       | 35           | 1.61 (1.13-2.29)       | 5            | 0.90 (0.37-2.19)       | 0.81                                    |
| <b>Recent use of estrogen + progesterone</b>      |                              |                        |              |                        |              |                        |              |                        |                                         |
| Gap time ≤ 1 year                                 | 17                           | 0.95 (0.58-1.55)       | 27           | 0.99 (0.67-1.47)       | 55           | 1.67 (1.23-2.25)       | 31           | 1.93 (1.31-2.85)       | 0.004                                   |
| Gap time 1-3 years                                | 6                            | 0.69 (0.31-1.55)       | 12           | 1.02 (0.57-1.82)       | 12           | 0.93 (0.52-1.66)       | 8            | 1.77 (0.87-3.60)       | 0.28                                    |
| Gap time 3-5 years                                | 2                            | 0.64 (0.16-2.58)       | 6            | 1.37 (0.61-3.07)       | 5            | 0.92 (0.38-2.23)       | 3            | 1.62 (0.52-5.10)       | 0.40                                    |
| Gap time > 5 years                                | 6                            | 1.04 (0.46-2.32)       | 12           | 1.65 (0.93-2.92)       | 7            | 0.86 (0.41-1.82)       | 1            | 0.43 (0.06-3.10)       | 0.14                                    |
| <b>Recent use of estrogen + dydrogesterone</b>    |                              |                        |              |                        |              |                        |              |                        |                                         |
| Gap time ≤ 1 year                                 | 22                           | 1.40 (0.90-2.16)       | 24           | 1.14 (0.75-1.74)       | 30           | 1.42 (0.97-2.08)       | 11           | 1.18 (0.64-2.18)       | 0.88                                    |
| Gap time 1-3 years                                | 9                            | 1.54 (0.79-2.99)       | 10           | 1.36 (0.72-2.54)       | 10           | 1.23 (0.65-2.31)       | 5            | 1.87 (0.77-4.56)       | 0.98                                    |
| Gap time 3-5 years                                | 2                            | 0.93 (0.23-3.71)       | 4            | 1.61 (0.60-4.31)       | 4            | 1.28 (0.48-3.43)       | 2            | 1.71 (0.43-6.90)       | 0.86                                    |
| Gap time > 5 years                                | 4                            | 1.29 (0.48-3.45)       | 2            | 0.52 (0.13-2.09)       | 9            | 2.12 (1.09-4.12)       | 2            | 1.92 (0.48-7.77)       | 0.59                                    |
| <b>Recent use of estrogen + other progestagen</b> |                              |                        |              |                        |              |                        |              |                        |                                         |
| Gap time ≤ 1 year                                 | 94                           | 1.96 (1.55-2.49)       | 112          | 1.81 (1.46-2.24)       | 111          | 1.82 (1.46-2.25)       | 52           | 2.37 (1.76-3.20)       | 0.25                                    |
| Gap time 1-3 years                                | 30                           | 1.70 (1.17-2.47)       | 44           | 2.07 (1.51-2.83)       | 42           | 1.99 (1.44-2.74)       | 12           | 2.04 (1.14-3.65)       | 0.42                                    |
| Gap time 3-5 years                                | 6                            | 1.15 (0.51-2.58)       | 9            | 1.32 (0.68-2.56)       | 16           | 2.27 (1.37-3.75)       | 2            | 1.14 (0.28-4.57)       | 0.43                                    |
| Gap time > 5 years                                | 7                            | 0.94 (0.44-1.98)       | 19           | 2.15 (1.35-3.40)       | 19           | 2.15 (1.35-3.42)       | 2            | 0.99 (0.25-4.01)       | 0.43                                    |

Abbreviations: EP-MHT, estrogen-progestagen menopausal hormone therapy; CI, confidence interval

\* Adjusted for the same covariates as in Table 2bis. In analyses according to type of recent EP-MHT, models are additionally adjusted for past use of estrogen combined with progesterone, estrogen combined with dydrogesterone, estrogen combined with other progestagens
